# Supplementary material
Source: Springer Nature journal article supplement (https://www.springermedizin.de/resource/supplementary/13075_2013_4411_MOESM1_ESM.pdf/10110356)
Supplement: MOESM1 [file 10110356]

## **Initial Participant Pool**

( n = 2,723)

Rheumatoid arthritis and osteoarthritis participants (1,496) and participants from two healthy aging studies (n = 994), and ultra-marathoners (n = 203) who responded to an invitation and nursing home residents (n = 30) interviewed at the nursing home

### **Group 1**

#### **Ceiling Item Group**

(n = 845)

Participants with disability scores of 0.025 or lower (n = 632) or ultra-marathoners (n = 203)

### **Group 2**

#### **Floor Item Group**

(n = 893)

Participants with disability scores of 1.0 or higher (n = 863) or nursing home residents (n = 30)

### **Group 3**

#### **Intermediate Group** (n = 985)

Participants with disability scores from 0 to 3.
